# Supplementary material
Source: PubMed Central journal article supplement (PMC7657707)
Supplement: 10-1055-s-0040-1718535-s200112ra.pdf [file 10-1055-s-0040-1718535-s200112ra.pdf]

**Supplementary Table S1** Bibliography: references organized by the nine topical domains in the order they were cited; symbols indicate the following source information

|                                                                                                                                                                                                                                                                                                                                                                                                                                                                                                                                                                                                                                                                                                                                                                                                                                                                                                                                                                                                                                                                                                                                                                                                                                                                                                                                                                                                                                                                                                                                                                                                                                                                                                                                                                                                                                                                                                                                                                                                                                                                                                                                                                                                                                                                                                                                                                                                                                                                                                                                                                                                                                                                                                                                                                                                                                                                                                                                                                                                                                                                                                                                                                                                                                                                                                                                                                                                                                                                                                                                                                                                                                                                                                                                                                                             |
|---------------------------------------------------------------------------------------------------------------------------------------------------------------------------------------------------------------------------------------------------------------------------------------------------------------------------------------------------------------------------------------------------------------------------------------------------------------------------------------------------------------------------------------------------------------------------------------------------------------------------------------------------------------------------------------------------------------------------------------------------------------------------------------------------------------------------------------------------------------------------------------------------------------------------------------------------------------------------------------------------------------------------------------------------------------------------------------------------------------------------------------------------------------------------------------------------------------------------------------------------------------------------------------------------------------------------------------------------------------------------------------------------------------------------------------------------------------------------------------------------------------------------------------------------------------------------------------------------------------------------------------------------------------------------------------------------------------------------------------------------------------------------------------------------------------------------------------------------------------------------------------------------------------------------------------------------------------------------------------------------------------------------------------------------------------------------------------------------------------------------------------------------------------------------------------------------------------------------------------------------------------------------------------------------------------------------------------------------------------------------------------------------------------------------------------------------------------------------------------------------------------------------------------------------------------------------------------------------------------------------------------------------------------------------------------------------------------------------------------------------------------------------------------------------------------------------------------------------------------------------------------------------------------------------------------------------------------------------------------------------------------------------------------------------------------------------------------------------------------------------------------------------------------------------------------------------------------------------------------------------------------------------------------------------------------------------------------------------------------------------------------------------------------------------------------------------------------------------------------------------------------------------------------------------------------------------------------------------------------------------------------------------------------------------------------------------------------------------------------------------------------------------------------------|
| Domain 1: financial considerations                                                                                                                                                                                                                                                                                                                                                                                                                                                                                                                                                                                                                                                                                                                                                                                                                                                                                                                                                                                                                                                                                                                                                                                                                                                                                                                                                                                                                                                                                                                                                                                                                                                                                                                                                                                                                                                                                                                                                                                                                                                                                                                                                                                                                                                                                                                                                                                                                                                                                                                                                                                                                                                                                                                                                                                                                                                                                                                                                                                                                                                                                                                                                                                                                                                                                                                                                                                                                                                                                                                                                                                                                                                                                                                                                          |
| <p>Penrod LE. Electronic Health Record Transition Considerations. <i>PM R</i>. 2017 May;9(5S):S13–8</p> <p><sup>a</sup>Price S. Making the CEHRT Switch: EHR Upgrade Required for Incentive Payment Programs. <i>Tex Med</i>. 2019;115(1):40–42</p> <p><sup>a</sup>Lammers EJ, Zheng K. Characteristics Associated with Hospital Health IT Vendor Switching and Dropping. <i>AMIA Annu Symp Proc</i>. 2011;2011:742–749. Available at: <a href="https://www.ncbi.nlm.nih.gov/pmc/articles/PMC3243192/">https://www.ncbi.nlm.nih.gov/pmc/articles/PMC3243192/</a>. Accessed Aug 21, 2020</p> <p><sup>a</sup>Adler KG, Edsall RL. EHR Switch Survey: Responses From 305 Family Physicians. <i>Fam Pract Manag</i>. 2015;22(1):13–18</p> <p><sup>a</sup>Jones HW. Exploring HIT Contract Cadavers to Avoid HIT Managerial Malpractice. In: <i>HIT or Miss</i>, 3rd Edition, Leviss J (ed). Boca Raton, FL: CRC Press; 2019:209–22</p> <p><sup>a</sup>McGreevey J, Mallozzi CP, Perkins RM, et al. Reducing alert burden in electronic health records: State of the art recommendations from four health systems. <i>Appl Clin Inform</i> 2020;11:1–12</p> <p><sup>c</sup>What is the Average IT Consulting Rate in DC, MD, and VA? [Internet]. <i>Optimal Networks</i>. 2015. Available at: <a href="https://resource.optimalnetworks.com/blog/2015/01/15/it-consulting-rate-cost-dc-md-va">https://resource.optimalnetworks.com/blog/2015/01/15/it-consulting-rate-cost-dc-md-va</a>. Accessed Aug 21, 2020</p> <p><sup>c</sup>Jayanthi A, Ellison A. 8 hospitals' finances hurt by EHR costs [Internet]. <i>Becker's Hospital CFO Report</i>. Available at: <a href="https://www.beckershospitalreview.com/finance/8-hospitals-finances-hurt-by-ehr-costs.html">https://www.beckershospitalreview.com/finance/8-hospitals-finances-hurt-by-ehr-costs.html</a>. Accessed Aug 21, 2020</p> <p><sup>a</sup>Braverman JA, Blumenthal-Barby JS. Assessment of the sunk-cost effect in clinical decision-making. <i>Soc Sci Med</i>. 2012 Jul;75(1):186–9</p> <p><sup>a</sup>Schreiber R, Garber L. Data migration: A thorny issue in electronic health record transitions. <i>ACI Open</i>. 2020;4(1):e48-e58. Published online 26 May 2020.</p> <p>Gettinger A, Csatari A. Transitioning from a Legacy EHR to a Commercial, Vendor-supplied, EHR. <i>Appl Clin Inform</i>. 2012 Oct 10;3(4):367–7</p> <p>McEvoy D, Barnett ML, Sittig DF, Aaron S, Mehrotra A, Wright A. Changes in hospital bond ratings after the transition to a new electronic health record. <i>J Am Med Inform Assoc</i>. 2018 01;25(5):572–4</p> <p><sup>c</sup>Murphy K. Epic EHR Adoption Partly to Blame in Maine Hospital Debate [Internet]. <i>EHR Intelligence</i>. 2013. Available at: <a href="https://ehrintelligence.com/news/epic-ehr-adoption-partly-to-blame-in-maine-hospital-debate">https://ehrintelligence.com/news/epic-ehr-adoption-partly-to-blame-in-maine-hospital-debate</a>. Accessed Aug 21, 2020</p> <p><sup>a</sup>Yuan N, Dudley RA, Boscardin WJ, Lin GA. Electronic health records systems and hospital clinical performance: a study of nationwide hospital data. <i>J Am Med Inform Assoc</i>. 2019 Oct 1;26(10):999–1009</p> <p><sup>a</sup>Adler-Milstein J, Everson J, Lee S-YD. EHR Adoption and Hospital Performance: Time-Related Effects. <i>Health Serv Res</i>. 2015 Dec;50(6):1751–71</p> <p><sup>c</sup>Cohen J. I'd like to phone a friend: CIOs favor peer input over rankings when choosing an EHR system. <i>Modern Healthcare</i>. Published April 22, 2019. Available at: <a href="https://www.pressreader.com/usa/modern-healthcare/20190422/281900184609872">https://www.pressreader.com/usa/modern-healthcare/20190422/281900184609872</a>. Accessed Aug 21, 2020</p> |
| Domain 2: human infrastructure                                                                                                                                                                                                                                                                                                                                                                                                                                                                                                                                                                                                                                                                                                                                                                                                                                                                                                                                                                                                                                                                                                                                                                                                                                                                                                                                                                                                                                                                                                                                                                                                                                                                                                                                                                                                                                                                                                                                                                                                                                                                                                                                                                                                                                                                                                                                                                                                                                                                                                                                                                                                                                                                                                                                                                                                                                                                                                                                                                                                                                                                                                                                                                                                                                                                                                                                                                                                                                                                                                                                                                                                                                                                                                                                                              |
| <p><sup>b</sup>Zandieh SO, Mills SA, Yoon-Flannery K, Yoon-Flannery K, Kuperman GJ, Kaushal R. Providers' expectations of ambulatory electronic health records (EHRs). <i>AMIA Annu Symp Proc</i>. 2008 Nov 6;1191</p> <p><sup>a</sup>Ray JM, Ratwani RM, Sinsky CA, Frankel RM, Friedberg MW, Powsner SM, et al. Six habits of highly successful health information technology: powerful strategies for design and implementation. <i>J Am Med Inform Assoc</i>. 2019 Oct 1;26(10):1109–1</p> <p><sup>a</sup>Johnson KB, Sternberg P, Dubree M. An EPIC Switch: Observations and Opportunities After Go-Live. <i>J Med Syst</i>. 2018;42(9):174. doi:10.1007/s10916-018-1023-5</p>                                                                                                                                                                                                                                                                                                                                                                                                                                                                                                                                                                                                                                                                                                                                                                                                                                                                                                                                                                                                                                                                                                                                                                                                                                                                                                                                                                                                                                                                                                                                                                                                                                                                                                                                                                                                                                                                                                                                                                                                                                                                                                                                                                                                                                                                                                                                                                                                                                                                                                                                                                                                                                                                                                                                                                                                                                                                                                                                                                                                                                                                                                         |
| Domain 3: technical considerations                                                                                                                                                                                                                                                                                                                                                                                                                                                                                                                                                                                                                                                                                                                                                                                                                                                                                                                                                                                                                                                                                                                                                                                                                                                                                                                                                                                                                                                                                                                                                                                                                                                                                                                                                                                                                                                                                                                                                                                                                                                                                                                                                                                                                                                                                                                                                                                                                                                                                                                                                                                                                                                                                                                                                                                                                                                                                                                                                                                                                                                                                                                                                                                                                                                                                                                                                                                                                                                                                                                                                                                                                                                                                                                                                          |
| <p><sup>a</sup>Lammers EJ, Zheng K. Characteristics Associated with Hospital Health IT Vendor Switching and Dropping. <i>AMIA Annu Symp Proc</i>. 2011;2011:742–749. Available at: <a href="https://www.ncbi.nlm.nih.gov/pmc/articles/PMC3243192/">https://www.ncbi.nlm.nih.gov/pmc/articles/PMC3243192/</a>. Accessed Aug 21, 2020</p> <p>Gettinger A, Csatari A. Transitioning from a Legacy EHR to a Commercial, Vendor-supplied, EHR. <i>Appl Clin Inform</i>. 2012 Oct 10;3(4):367–76</p> <p><sup>c</sup>Magrabi F, Liaw ST, Arachi D, Runciman W, Coiera E, Kidd MR. Identifying patient safety problems associated with information technology in general practice: an analysis of incident reports. <i>BMJ Qual Saf</i>. 2016 Nov 1;25(11):870–8</p> <p><sup>c</sup>Makar M. Dealing with existing data in legacy systems when transitioning between Electronic Health Records in three Swedish counties [Master thesis]. Stockholm University; 2014. <a href="https://ki.se/sites/default/files/migrate/dealing_mina_makar.pdf">https://ki.se/sites/default/files/migrate/dealing_mina_makar.pdf</a> Accessed Aug 21, 2020</p> <p><sup>a</sup>Pfoh ER, Abramson E, Zandieh S, Edwards A, Kaushal R. Satisfaction after the transition between electronic health record systems at six ambulatory practices. <i>J Eval Clin Pract</i>. 2012 Dec;18(6):1133–9</p> <p><sup>a</sup>Johnson KB, Sternberg P, Dubree M. An EPIC Switch: Observations and Opportunities After Go-Live. <i>J Med Syst</i>. 2018;42(9):174. doi:10.1007/s10916-018-1023-5</p> <p><sup>a</sup>dSittig DF, Wright A, Ash J, Singh H. New Unintended Adverse Consequences of Electronic Health Records. <i>Yearb Med Inform</i>. 2016;(1):7–12. doi:10.15265/IY-2016-023</p>                                                                                                                                                                                                                                                                                                                                                                                                                                                                                                                                                                                                                                                                                                                                                                                                                                                                                                                                                                                                                                                                                                                                                                                                                                                                                                                                                                                                                                                                                                                                                                                                                                                                                                                                                                                                                                                                                                                                                                                                                                   |
| Domain 4: data migration                                                                                                                                                                                                                                                                                                                                                                                                                                                                                                                                                                                                                                                                                                                                                                                                                                                                                                                                                                                                                                                                                                                                                                                                                                                                                                                                                                                                                                                                                                                                                                                                                                                                                                                                                                                                                                                                                                                                                                                                                                                                                                                                                                                                                                                                                                                                                                                                                                                                                                                                                                                                                                                                                                                                                                                                                                                                                                                                                                                                                                                                                                                                                                                                                                                                                                                                                                                                                                                                                                                                                                                                                                                                                                                                                                    |
| <p>Penrod LE. Electronic Health Record Transition Considerations. <i>PM R</i>. 2017 May;9(5S):S13–8</p> <p><sup>a</sup>Adler KG, Edsall RL. EHR Switch Survey: Responses From 305 Family Physicians. <i>Fam Pract Manag</i>. 2015;22(1):13–18</p> <p><sup>a</sup>Schreiber R, Garber L. Data migration: A thorny issue in electronic health record transitions. <i>ACI Open</i>. 2020;4(1):e48-e58. Published online 26 May 2020.</p> <p>Gettinger A, Csatari A. Transitioning from a Legacy EHR to a Commercial, Vendor-supplied, EHR. <i>Appl Clin Inform</i>. 2012 Oct 10;3(4):367–7</p> <p><sup>c</sup>Magrabi F, Liaw ST, Arachi D, Runciman W, Coiera E, Kidd MR. Identifying patient safety problems associated with information technology in general practice: an analysis of incident reports. <i>BMJ Qual Saf</i>. 2016 Nov 1;25(11):870–8</p> <p>Makar M. Dealing with existing data in legacy systems when transitioning between Electronic Health Records in three Swedish counties [Master thesis]. Stockholm University; 201</p> <p>Saleem JJ, Herout J. Transitioning from one Electronic Health Record (EHR) to Another: A Narrative Literature Review. <i>Proceedings of the Human Factors and Ergonomics Society Annual Meeting</i> [Internet]. 2018 Sep 1; 62(1):489–93. Available at: <a href="https://doi.org/10.1177/1541931218621112">https://doi.org/10.1177/1541931218621112</a>. Accessed Aug 21, 2020</p> <p><sup>a</sup>Behlen FM, Sayre RE, Weldy JB, Michael JS. "Permanent" records: Experience with data migration in radiology information system and picture archiving and communication system replacement. <i>J Digit Imaging</i> [Internet]. 2000 May;13(Suppl 1):171–4. Available at: <a href="https://www.ncbi.nlm.nih.gov/pmc/articles/PMC3453274/">https://www.ncbi.nlm.nih.gov/pmc/articles/PMC3453274/</a> Accessed Aug 21, 2020</p> <p>Bornstein S. An integrated EHR at Northern California Kaiser Permanente. <i>Appl Clin Inform</i>. 2012 Aug 8;3(3):318–2</p> <p>Lin J, Ranslam K, Shi F, Figurski M, Liu Z. Data Migration from Operating EMRs to OpenEMR with Mirth Connect. <i>Stud Health Technol Inform</i>. 2019;257:288–9</p> <p><sup>a</sup>Epstein RH, Dexter F, Schwenk ES. Provider Access to Legacy Electronic Anesthesia Records Following Implementation of an Electronic Health Record System. <i>J Med Syst</i>. 2019 Mar 16;43(5):105</p> <p><sup>c</sup>Cahill R. Medical Record Retention [Internet]. <i>The Doctors Company</i>. Available at: <a href="https://www.thedoctors.com/articles/medical-record-retention/">https://www.thedoctors.com/articles/medical-record-retention/</a> Accessed Aug 21, 2020</p> <p><sup>c</sup>31. Medical Record Shredding Guidelines for New York [Internet]. <i>Confidata</i>. 2018. Available at: <a href="https://www.confidata.com/news/paper-shredding/medical-record-shredding-guidelines/">https://www.confidata.com/news/paper-shredding/medical-record-shredding-guidelines/</a> Accessed Aug 21, 2020</p> <p><sup>a</sup>D'Amore JD, Mandel JC, Kreda DA, Swain A, Koromia GA, Sundareswaran S, et al. Are Meaningful Use Stage 2 certified EHRs ready for interoperability? Findings from the SMART C-CDA Collaborative. <i>J Am Med Inform Assoc</i>. 2014 Dec;21(6):1060–8</p>                                                                                                                                                                                                                                                                                                                                                                                                                                                                                     |

(Continued)

## Supplementary Table S1 (Continued)

|                                                                                                                                                                                                                                                                                                                                                                                                                                                                                                                                                                                                                                                                                                                                                                                                                                                                                                                                                                                                                                                                                                                                                                                                                                                                                                                                                                                                                                                                                                                                                                                                                                                                                                                                                                                                                                                                                                                                                                                                                                                                                                                                                                                                                                                                                                                                                                                                                                                                                                                                                                                                                                                                                                                                                                                                                                                                                                                                                                                                                                                                                                                                                                                                                                                                                                                                                                                                                                                                                                                                               |
|-----------------------------------------------------------------------------------------------------------------------------------------------------------------------------------------------------------------------------------------------------------------------------------------------------------------------------------------------------------------------------------------------------------------------------------------------------------------------------------------------------------------------------------------------------------------------------------------------------------------------------------------------------------------------------------------------------------------------------------------------------------------------------------------------------------------------------------------------------------------------------------------------------------------------------------------------------------------------------------------------------------------------------------------------------------------------------------------------------------------------------------------------------------------------------------------------------------------------------------------------------------------------------------------------------------------------------------------------------------------------------------------------------------------------------------------------------------------------------------------------------------------------------------------------------------------------------------------------------------------------------------------------------------------------------------------------------------------------------------------------------------------------------------------------------------------------------------------------------------------------------------------------------------------------------------------------------------------------------------------------------------------------------------------------------------------------------------------------------------------------------------------------------------------------------------------------------------------------------------------------------------------------------------------------------------------------------------------------------------------------------------------------------------------------------------------------------------------------------------------------------------------------------------------------------------------------------------------------------------------------------------------------------------------------------------------------------------------------------------------------------------------------------------------------------------------------------------------------------------------------------------------------------------------------------------------------------------------------------------------------------------------------------------------------------------------------------------------------------------------------------------------------------------------------------------------------------------------------------------------------------------------------------------------------------------------------------------------------------------------------------------------------------------------------------------------------------------------------------------------------------------------------------------------------|
| <p><sup>a</sup>Mandel JC, Kreda DA, Mandl KD, Kohane IS, Raponi RB. SMART on FHIR: a standards-based, interoperable apps platform for electronic health records. <i>J Am Med Inform Assoc.</i> 2016;23(5):899–908</p> <p><sup>c</sup>HL7 FHIR R4 [Internet]. HL7 International. Available at: <a href="http://hl7.org/fhir/services.html">http://hl7.org/fhir/services.html</a>. Accessed Aug 21, 2020<sup>b</sup>Yang Y, Zhang Y. Application of Mirth Connect interface integration engine in medical data transmission. <i>Industrial Control Computer.</i> 2016;29:112–3</p> <p><sup>a</sup>Camacho Rodriguez JC, Stäubert S, Löbe M. Automated Import of Clinical Data from HL7 Messages into OpenClinica and tranSMART Using Mirth Connect. <i>Stud Health Technol In-form.</i> 2016;228:317–21</p> <p><sup>b</sup>Bortis G. Experiences with Mirth: an open source health care integration engine. In: Proceedings of the 30th international conference on Software engineering [Internet]. Leipzig, Germany: Association for Computing Machinery. 2008. p. 649–652. (ICSE '08). Available at: <a href="https://doi.org/10.1145/1368088.1368179">https://doi.org/10.1145/1368088.1368179</a>. Accessed Aug 21, 2020</p>                                                                                                                                                                                                                                                                                                                                                                                                                                                                                                                                                                                                                                                                                                                                                                                                                                                                                                                                                                                                                                                                                                                                                                                                                                                                                                                                                                                                                                                                                                                                                                                                                                                                                                                                                                                                                                                                                                                                                                                                                                                                                                                                                                                                                                                                                                                |
| Domain 5: patient safety                                                                                                                                                                                                                                                                                                                                                                                                                                                                                                                                                                                                                                                                                                                                                                                                                                                                                                                                                                                                                                                                                                                                                                                                                                                                                                                                                                                                                                                                                                                                                                                                                                                                                                                                                                                                                                                                                                                                                                                                                                                                                                                                                                                                                                                                                                                                                                                                                                                                                                                                                                                                                                                                                                                                                                                                                                                                                                                                                                                                                                                                                                                                                                                                                                                                                                                                                                                                                                                                                                                      |
| <p><sup>a</sup>Zandieh SO, Mills SA, Yoon-Flannery K, Yoon-Flannery K, Kuperman GJ, Kaushal R. Providers' expectations of ambulatory electronic health records (EHRs). <i>AMIA Annu Symp Proc.</i> 2008 Nov 6;1191</p> <p><sup>b</sup>Jones HW. Exploring HIT Contract Cadavers to Avoid HIT Managerial Malpractice. In: HIT or Miss, 3rd Edition, Leviss J (ed). Boca Raton, FL: CRC Press; 2019:209–22</p> <p>Gettinger A, Csatar A. Transitioning from a Legacy EHR to a Commercial, Vendor-supplied, EHR. <i>Appl Clin Inform.</i> 2012 Oct 10;3(4):367–7</p> <p><sup>a</sup>Binney G, Cole-Poklewski T, Roomian T, et al. Effect of an Electronic Health Record Transition on the Provision of Recommended Well Child Services in Pediatric Primary Care Practices. <i>Clin Pediatr (Phila).</i> 2020;59(2):188–197. doi:10.1177/000922819892269</p> <p>Abramson EL, Patel V, Malhotra S, Pfoh ER, Nena Osorio S, Cheriff A, et al. Physician experiences transitioning between an older versus newer electronic health record for electronic prescribing. <i>Int J Med Inform.</i> 2012 Aug;81(8):539–4</p> <p><sup>a</sup>Girard NJ. DRESSed for failure. <i>AORN J.</i> 2015 Apr;101(4):504, 46</p> <p>Whalen K, Lynch E, Moawad I, John T, Lozowski D, Cummings BM. Transition to a new electronic health record and pediatric medication safety: lessons learned in pediatrics within a large academic health system. <i>J Am Med Inform Assoc.</i> 2018 01;25(7):848–54</p> <p><sup>a</sup>Classen DC, Resar R, Griffin F, Federico F, Frankel T, Kimmel N, et al. "Global trigger tool" shows that adverse events in hospitals may be ten times greater than previously measured. <i>Health Aff (Millwood).</i> 2011 Apr;30(4):581–9</p> <p><sup>a</sup>McGreevey JD, Mallozzi CP, Perkins RM, Shelov E, Schreiber R. Reducing Alert Burden in Electronic Health Records: State of the Art Recommendations from Four Health Systems. <i>Appl Clin Inform.</i> 2020;11(1):1–12. doi:10.1055/s-0039-3402715</p> <p><sup>a</sup>Wright A, Aaron S, Seger DL, Samal L, Schiff GD, Bates DW. Reduced Effectiveness of Interruptive Drug-Drug Interaction Alerts after Conversion to a Commercial Electronic Health Record. <i>J Gen Intern Med.</i> 2018;33(11):1868–1876. doi:10.1007/s11606-018-4415-9</p> <p><sup>d</sup>Sittig DF, Wright A, Ash J, Singh H. New Unintended Adverse Consequences of Electronic Health Records. <i>Yearb Med Inform.</i> 2016;(1):7–12. doi:10.15265/IY-2016-023</p> <p><sup>d</sup>Colicchio TK, Del Fiol G, Scammon DL, Facelli JC, Bowes 3rd WA, Narus SP. Comprehensive methodology to monitor longitudinal change patterns during EHR implementations: a case study at a large health care delivery network. <i>J Biomed Informatics.</i> 2018 Jul;83:40–53. Epub 2018 May 29.</p>                                                                                                                                                                                                                                                                                                                                                                                                                                                                                                                                                                                                                                                                                                             |
| Domain 6: provider expectations                                                                                                                                                                                                                                                                                                                                                                                                                                                                                                                                                                                                                                                                                                                                                                                                                                                                                                                                                                                                                                                                                                                                                                                                                                                                                                                                                                                                                                                                                                                                                                                                                                                                                                                                                                                                                                                                                                                                                                                                                                                                                                                                                                                                                                                                                                                                                                                                                                                                                                                                                                                                                                                                                                                                                                                                                                                                                                                                                                                                                                                                                                                                                                                                                                                                                                                                                                                                                                                                                                               |
| <p><sup>a</sup>Adler KG, Edsall RL. EHR Switch Survey: Responses From 305 Family Physicians. <i>Fam Pract Manag.</i> 2015;22(1):13–18</p> <p><sup>c</sup>Magrabi F, Liaw ST, Arachi D, Runciman W, Coiera E, Kidd MR. Identifying patient safety problems associated with information technology in general practice: an analysis of incident reports. <i>BMJ Qual Saf.</i> 2016 Nov 1;25(11):870–8</p> <p>Makar M. Dealing with existing data in legacy systems when transitioning between Electronic Health Records in three Swedish counties [Master thesis]. Stockholm University; 2014</p> <p>Pfoh ER, Abramson E, Zandieh S, Edwards A, Kaushal R. Satisfaction after the transition between electronic health record systems at six ambulatory practices. <i>J Eval Clin Pract.</i> 2012 Dec;18(6):1133–9</p> <p><sup>b</sup>Bortis G. Experiences with Mirth: an open source health care integration engine. In: Proceedings of the 30th international conference on Software engineering [Internet]. Leipzig, Germany: Association for Computing Machinery. 2008. p. 649–652. (ICSE '08). Available at: <a href="https://doi.org/10.1145/1368088.1368179">https://doi.org/10.1145/1368088.1368179</a>. Accessed Aug 21, 2020</p> <p>Whalen K, Lynch E, Moawad I, John T, Lozowski D, Cummings BM. Transition to a new electronic health record and pediatric medication safety: lessons learned in pediatrics within a large academic health system. <i>J Am Med Inform Assoc.</i> 2018 01;25(7):848–54</p> <p><sup>a</sup>Zandieh SO, Yoon-Flannery K, Kuperman GJ, Langsam DJ, Hyman D, Kaushal R. Challenges to EHR Implementation in Electronic-Versus Paper-based Office Practices. <i>J Gen Intern Med.</i> 2008 Jun;23(6):755–61</p> <p><sup>a</sup>Noblin A, Cortelyou-Ward K, Cantiello J, Breyer T, Oliveira L, Dangiolo M, et al. EHR implementation in a new clinic: a case study of clinician perceptions. <i>J Med Syst.</i> 2013 Aug;37(4):9955</p> <p><sup>a</sup>Zandieh SO, Yoon-Flannery K, Yoon-Flannery K, Kuperman GJ, Hyman D, Kaushal R. Correlates of expected satisfaction with electronic health records in office practices by practitioners. <i>AMIA Annu Symp Proc.</i> 2008 Nov 6;1190</p> <p><sup>a</sup>Reynolds TL, Clay B, Rudkin SE, et al. Migrating from One Comprehensive Commercial EHR to Another: Perceptions of Front-line Clinicians and Staff. <i>AMIA Annu Symp Proc.</i> 2019;2019:765–77</p> <p><sup>a</sup>Hanauer DA, Branford GL, Greenberg G, et al. Two-year longitudinal assessment of physicians' perceptions after replacement of a longstanding homegrown electronic health record: does a J-curve of satisfaction really exist? <i>J Am Med Inform Assoc.</i> 2017;24(e1):e157–e165. doi:10.1093/jamia/ocw077</p> <p><sup>a</sup>Pandit RR, Boland MV. The impact of an electronic health record transition on a glaucoma subspecialty practice. <i>Ophthalmology.</i> 2013;120(4):753–760. doi:10.1016/j.ophtha.2012.10.002</p> <p><sup>a</sup>Pirtle CJ, Reeder RR, Lehmann CU, Unertl KM, Lorenzi NM. Physician Perspectives on Training for an EHR Implementation. <i>Stud Health Technol Inform.</i> 2019;264:1318–1322. doi:10.3233/SHT119044</p> <p><sup>d</sup>Colicchio TK, Del Fiol G, Scammon DL, Facelli JC, Bowes 3rd WA, Narus SP. Comprehensive methodology to monitor longitudinal change patterns during EHR implementations: a case study at a large health care delivery network. <i>J Biomed Informatics.</i> 2018 Jul;83:40–53. Epub 2018 May 29.</p> |
| Domain 7: patient expectations                                                                                                                                                                                                                                                                                                                                                                                                                                                                                                                                                                                                                                                                                                                                                                                                                                                                                                                                                                                                                                                                                                                                                                                                                                                                                                                                                                                                                                                                                                                                                                                                                                                                                                                                                                                                                                                                                                                                                                                                                                                                                                                                                                                                                                                                                                                                                                                                                                                                                                                                                                                                                                                                                                                                                                                                                                                                                                                                                                                                                                                                                                                                                                                                                                                                                                                                                                                                                                                                                                                |
| <p><sup>b</sup>North F, Pecina JL, Tulledge-Scheitel SM, Chaudhry R, Matulis JC, Ebbert JO. Is a switch to a different electronic health record associated with a change in patient satisfaction? <i>J Am Med Inform Assoc.</i> 2020;27(6):867–876. doi:10.1093/jamia/ocaa026</p> <p><sup>a</sup>Pandit RR, Boland MV. The impact of an electronic health record transition on a glaucoma subspecialty practice. <i>Ophthalmology.</i> 2013;120(4):753–760. doi:10.1016/j.ophtha.2012.10.002</p>                                                                                                                                                                                                                                                                                                                                                                                                                                                                                                                                                                                                                                                                                                                                                                                                                                                                                                                                                                                                                                                                                                                                                                                                                                                                                                                                                                                                                                                                                                                                                                                                                                                                                                                                                                                                                                                                                                                                                                                                                                                                                                                                                                                                                                                                                                                                                                                                                                                                                                                                                                                                                                                                                                                                                                                                                                                                                                                                                                                                                                              |
| Domain 8: training and support                                                                                                                                                                                                                                                                                                                                                                                                                                                                                                                                                                                                                                                                                                                                                                                                                                                                                                                                                                                                                                                                                                                                                                                                                                                                                                                                                                                                                                                                                                                                                                                                                                                                                                                                                                                                                                                                                                                                                                                                                                                                                                                                                                                                                                                                                                                                                                                                                                                                                                                                                                                                                                                                                                                                                                                                                                                                                                                                                                                                                                                                                                                                                                                                                                                                                                                                                                                                                                                                                                                |
| <p><sup>a</sup>Price S. Making the CEHRT Switch: EHR Upgrade Required for Incentive Payment Programs. <i>Tex Med.</i> 2019;115(1):40–42</p> <p><sup>b</sup>Schreiber R, Koppel R, Craven C, McGreevey J. What could go wrong?: Migrating from one EHR to another. Presented at the: AMIA Annu Symp Proc; 2015; San Francisco, CA</p> <p>Pfoh ER, Abramson E, Zandieh S, Edwards A, Kaushal R. Satisfaction after the transition between electronic health record systems at six ambulatory practices. <i>J Eval Clin Pract.</i> 2012 Dec;18(6):1133–9</p> <p>Saleem JJ, Herout J. Transitioning from one Electronic Health Record (EHR) to Another: A Narrative Literature Review. Proceedings of the Human Factors</p>                                                                                                                                                                                                                                                                                                                                                                                                                                                                                                                                                                                                                                                                                                                                                                                                                                                                                                                                                                                                                                                                                                                                                                                                                                                                                                                                                                                                                                                                                                                                                                                                                                                                                                                                                                                                                                                                                                                                                                                                                                                                                                                                                                                                                                                                                                                                                                                                                                                                                                                                                                                                                                                                                                                                                                                                                       |

## Supplementary Table S1 (Continued)

|                                                                                                                                                                                                                                                                                                                                                                                                                                                                                                                                                                                                                                                                                                                                                                                                                                                                                                                                                                                                                                                                                                                                                                                                                                                                                                                                                                                                                                                                                                                                                                                                                                                                                                                                                                                                                                                                                                                 |
|-----------------------------------------------------------------------------------------------------------------------------------------------------------------------------------------------------------------------------------------------------------------------------------------------------------------------------------------------------------------------------------------------------------------------------------------------------------------------------------------------------------------------------------------------------------------------------------------------------------------------------------------------------------------------------------------------------------------------------------------------------------------------------------------------------------------------------------------------------------------------------------------------------------------------------------------------------------------------------------------------------------------------------------------------------------------------------------------------------------------------------------------------------------------------------------------------------------------------------------------------------------------------------------------------------------------------------------------------------------------------------------------------------------------------------------------------------------------------------------------------------------------------------------------------------------------------------------------------------------------------------------------------------------------------------------------------------------------------------------------------------------------------------------------------------------------------------------------------------------------------------------------------------------------|
| <p>and Ergonomics Society Annual Meeting [Internet]. 2018 Sep 1; 62(1):489–93. Available at: <a href="https://doi.org/10.1177/1541931218621112">https://doi.org/10.1177/1541931218621112</a>. Accessed Aug 21, 2020</p> <p>Abramson EL, Patel V, Malhotra S, Pfoh ER, Nena Osorio S, Cheriff A, et al. Physician experiences transitioning between an older versus newer electronic health record for electronic prescribing. <i>Int J Med Inform.</i> 2012 Aug;81(8):539–4</p> <p><sup>a</sup>Noblin A, Cortelyou-Ward K, Cantello J, Breyer T, Oliveira L, Dangiolo M, et al. EHR implementation in a new clinic: a case study of clinician perceptions. <i>J Med Syst.</i> 2013 Aug;37(4):9955</p> <p><sup>a</sup>Zandieh SO, Yoon-Flannery K, Yoon-Flannery K, Kuperman GJ, Hyman D, Kaushal R. Correlates of expected satisfaction with electronic health records in office practices by practitioners. <i>AMIA Annu Symp Proc.</i> 2008 Nov 6;1190</p> <p><sup>a</sup>Pirtle CJ, Reeder RR, Lehmann CU, Unertl KM, Lorenzi NM. Physician Perspectives on Training for an EHR Implementation. <i>Stud Health Technol Inform.</i> 2019;264:1318–1322. doi:10.3233/SHTI190440</p> <p><sup>b</sup>Rosenbaum M. Will 2018 be the year healthcare addresses its turnover problem? [Internet]. Becker's Hospital CFO Report. Available at: <a href="https://www.beckershospitalreview.com/finance/will-2018-be-the-year-healthcare-addresses-its-turnover-problem.html">https://www.beckershospitalreview.com/finance/will-2018-be-the-year-healthcare-addresses-its-turnover-problem.html</a>. Accessed Aug 21, 2020</p> <p><sup>a</sup>Sieja A, Markley K, Pell J, Gonzalez C, Redig B, Kneeland P, et al. Optimization Sprints: Improving Clinician Satisfaction and Teamwork by Rapidly Reducing Electronic Health Record Burden. <i>Mayo Clin Proc.</i> 2019;94(5):793–802</p>                              |
| Domain 9: cybersecurity                                                                                                                                                                                                                                                                                                                                                                                                                                                                                                                                                                                                                                                                                                                                                                                                                                                                                                                                                                                                                                                                                                                                                                                                                                                                                                                                                                                                                                                                                                                                                                                                                                                                                                                                                                                                                                                                                         |
| <p><sup>b</sup>Wisniewski PJ, Knijnenburg BP, Lipford HR. Making privacy personal: Profiling social network users to inform privacy education and nudging. <i>International Journal of Human-Computer Studies</i> [Internet]. 2017 Feb 1;98:95–108. Available at: <a href="http://www.sciencedirect.com/science/article/pii/S1071581916301185">http://www.sciencedirect.com/science/article/pii/S1071581916301185</a>. Accessed Aug 21, 2020</p> <p><sup>c</sup>Walker J, Koppel R. For Healthcare Cybersecurity the Whole is Weaker than the Sum of the Parts. <i>The Health Care Blog (THCB)</i>. 23 Sep 2016. Available at: <a href="https://thehealthcareblog.com/blog/2016/09/23/for-healthcare-cybersecurity-the-whole-is-weaker-than-the-sum-of-the-parts/">https://thehealthcareblog.com/blog/2016/09/23/for-healthcare-cybersecurity-the-whole-is-weaker-than-the-sum-of-the-parts/</a> Accessed Aug 21, 2020</p> <p><sup>c</sup>Koppel R, Thimbleby H. Lessons From the 100 Nation Ransomware Attack. <i>The Health Care Blog (THCB)</i>. 14 May 2017. <a href="https://thehealthcareblog.com/blog/2017/05/14/lessons-from-the-100-nation-ransomware-attack/">https://thehealthcareblog.com/blog/2017/05/14/lessons-from-the-100-nation-ransomware-attack/</a> Accessed Aug 21, 2020</p> <p><sup>c</sup>HealthIT. Top 10 Tips for Cybersecurity in Health Care [Internet]. Available at: <a href="https://www.healthit.gov/sites/default/files/Top_10_Tips_for_Cybersecurity.pdf">https://www.healthit.gov/sites/default/files/Top_10_Tips_for_Cybersecurity.pdf</a>. Accessed Aug 21, 2020</p>                                                                                                                                                                                                                                                                                                       |
| Domain 10: C-suite, chief medical information/informatics officer (CMIO) and chief information officer (CIO) team responsibilities                                                                                                                                                                                                                                                                                                                                                                                                                                                                                                                                                                                                                                                                                                                                                                                                                                                                                                                                                                                                                                                                                                                                                                                                                                                                                                                                                                                                                                                                                                                                                                                                                                                                                                                                                                              |
| <p><sup>c</sup>Jayanthi A, Ellison A. 8 hospitals' finances hurt by EHR costs [Internet]. Becker's Hospital CFO Report. Available at: <a href="https://www.beckershospitalreview.com/finance/8-hospitals-finances-hurt-by-ehr-costs.html">https://www.beckershospitalreview.com/finance/8-hospitals-finances-hurt-by-ehr-costs.html</a>. Accessed Aug 21, 2020</p> <p><sup>a</sup>Braverman JA, Blumenthal-Barby JS. Assessment of the sunk-cost effect in clinical decision-making. <i>Soc Sci Med.</i> 2012 Jul;75(1):186–9</p> <p><sup>a</sup>Silverman HD, Steen EB, Carpenito JN, Ondrula CJ, Williamson JJ, Fridsma DB. Domains, tasks, and knowledge for clinical informatics subspecialty practice: results of a practice analysis. <i>J Am Med Inform Assoc.</i> 2019 01;26(7):586–9</p> <p><sup>a</sup>Johnson KB, Sternberg P, Dubree M. An EPIC Switch: Observations and Opportunities After Go-Live. <i>J Med Syst.</i> 2018;42(9):174. doi:10.1007/s10916-018-1023-5</p> <p><sup>a</sup>Kannry J, Sengstack P, Thyvalikakath TP, Poikonen J, Middleton B, Payne T, et al. The Chief Clinical Informatics Officer (CCIO): AMIA Task Force Report on CCIO Knowledge, Education, and Skillset Requirements. <i>Appl Clin Inform.</i> 2016;7(1):143–76</p> <p>Pageler NM, Grazier G'Sell MJ, Chandler W, Mailes E, Yang C, Longhurst CA. A rational approach to legacy data validation when transitioning between electronic health record systems. <i>J Am Med Inform Assoc.</i> 2016;23(5):991–4</p> <p><sup>c</sup>KLAS [Internet]. The Arch Collaborative. Available at: <a href="http://klasresearch.com/arch-collaborative">http://klasresearch.com/arch-collaborative</a>. Accessed Aug 21, 2020</p> <p><sup>a</sup>Sittig DF, Wright A, Ash J, Singh H. New Unintended Adverse Consequences of Electronic Health Records. <i>Yearb Med Inform.</i> 2016;(1):7–12. doi:10.15265/Y-2016-023</p> |

Note: No mark indicates article included from our PubMed query.

<sup>a</sup>PubMed indexed but not retrieved by our query.

<sup>b</sup>Peer-reviewed article indexed but not in PubMed.

<sup>c</sup>Gray literature (e.g., newsletters, blogs, etc.).

<sup>d</sup>Suggested by reviewers.
